# Supplementary material
Source: Springer Nature journal article supplement (https://www.springermedizin.de/resource/supplementary/12936_2004_113_MOESM1_ESM.pdf/9546892)
Supplement: MOESM1 [file 9546892]

136 surveys mailed

51 returned undeliverable  
12 declined to complete  
28 never responded

45 completed surveys

5 did not fit criteria

40 fit inclusion criteria for Phase I
